# Supplementary material
Source: PubMed Central journal article supplement (PMC5952394)
Supplement: JB.00728-17_zjb999094759s1.pdf [file JB.00728-17_zjb999094759s1.pdf]

1 **Supplemental Materials**

2 **TABLE S1** The fatty acid profile of phosphatidyl glycerol present in WT *S. aureus* or a *geh lip* mutant supplemented with  
 3 human LDLs.

| Phosphatidyl glycerol* (TC:TDB) | WT cultured in tryptone broth          |        |                                                  | WT cultured in tryptone broth with human LDLs |        |                                                  | <i>geh lip</i> cultured in tryptone broth |       |                                                  | <i>geh lip</i> cultured in tryptone broth with human LDLs |       |                                                  |
|---------------------------------|----------------------------------------|--------|--------------------------------------------------|-----------------------------------------------|--------|--------------------------------------------------|-------------------------------------------|-------|--------------------------------------------------|-----------------------------------------------------------|-------|--------------------------------------------------|
|                                 | Normalized ion abundance / mg of cells | SD     | Fatty acids#                                     | Normalized ion abundance / mg of cells        | SD     | Fatty acids#                                     | Normalized ion abundance / mg of cells    | SD    | Fatty acids#                                     | Normalized ion abundance / mg of cells                    | SD    | Fatty acids#                                     |
| PG(28:0)                        | 10.69                                  | 0.80   | 13:0_15:0<br>14:0_14:0                           | 6.32                                          | 0.53   | 13:0_15:0<br>12:0_16:0                           | 18.44                                     | 1.63  | 13:0_15:0<br>16:0_12:0<br>14:0_14:0              | 7.09                                                      | 0.27  | 13:0_15:0<br>12:0_16:0                           |
| PG(30:0)                        | 726.33                                 | 61.40  | 15:0_15:0<br>16:0_14:0                           | 491.94                                        | 44.97  | 15:0_15:0<br>16:0_14:0                           | 859.61                                    | 54.09 | 15:0_15:0<br>16:0_14:0                           | 453.96                                                    | 11.47 | 15:0_15:0                                        |
| PG(30:1)                        | 0.00                                   | 0.00   | N.D.                                             | 0.11                                          | 0.08   | N.D.                                             | 0.13                                      | 0.06  | N.D.                                             | 0.00                                                      | 0.00  | N.D.                                             |
| PG(31:0)                        | 337.75                                 | 27.78  | 16:0_15:0<br>17:0_14:0<br>13:0_18:0              | 334.15                                        | 33.02  | 16:0_15:0<br>17:0_14:0<br>13:0_18:0              | 424.11                                    | 21.08 | 16:0_15:0<br>17:0_14:0<br>13:0_18:0              | 318.37                                                    | 10.16 | 16:0_15:0<br>17:0_14:0<br>13:0_18:0              |
| PG(31:1)                        | 1.96                                   | 0.19   | 16:1_15:0<br>14:1_17:0<br>12:1_19:0              | 7.46                                          | 0.38   | 16:1_15:0<br>14:1_17:0<br>12:1_19:0<br>11:1_20:0 | 2.64                                      | 0.24  | 16:1_15:0<br>14:1_17:0<br>12:1_19:0              | 3.02                                                      | 0.18  | 16:1_15:0<br>14:1_17:0<br>12:1_19:0<br>11:1_20:0 |
| PG(32:0)                        | 2644.01                                | 245.70 | 17:0_15:0<br>14:0_18:0                           | 2151.01                                       | 183.83 | 17:0_15:0<br>14:0_18:0<br>16:0_16:0              | 3029.60                                   | 83.82 | 17:0_15:0<br>14:0_18:0                           | 1981.65                                                   | 11.24 | 17:0_15:0                                        |
| PG(32:1)                        | 1.49                                   | 0.07   | N.D.                                             | 7.79                                          | 0.58   | 17:1_15:0<br>16:1_16:0<br>18:1_14:0              | 1.99                                      | 0.29  | 17:1_15:0<br>15:1_17:0<br>13:1_19:0              | 2.18                                                      | 0.10  | 17:1_15:0<br>16:1_16:0                           |
| PG(33:0)                        | 839.55                                 | 78.03  | 18:0_15:0<br>19:0_14:0<br>17:0_16:0<br>20:0_13:0 | 780.42                                        | 67.72  | 18:0_15:0                                        | 956.42                                    | 5.25  | 18:0_15:0<br>19:0_14:0<br>17:0_16:0<br>20:0_13:0 | 680.65                                                    | 6.84  | 18:0_15:0                                        |
| PG(33:1)                        | 12.76                                  | 1.01   | 18:1_15:0                                        | 214.05                                        | 19.82  | 18:1_15:0                                        | 14.19                                     | 0.59  | 18:1_15:0                                        | 28.02                                                     | 1.43  | 18:1_15:0                                        |
| PG(34:0)                        | 1292.40                                | 122.26 | 19:0_15:0<br>17:0_17:0                           | 1100.50                                       | 96.94  | 19:0_15:0<br>17:0_17:0<br>18:0_16:0              | 1491.05                                   | 9.92  | 19:0_15:0<br>17:0_17:0                           | 968.45                                                    | 5.89  | 19:0_15:0<br>17:0_17:0                           |
| PG(34:1)                        | 0.00                                   | 0.00   | N.D.                                             | 16.58                                         | 1.53   | 18:1_16:0<br>16:1_18:0                           | 0.00                                      | 0.00  | N.D.                                             | 0.00                                                      | 0.00  | N.D.                                             |

|          |        |       |                                     |        |       |                                                  |        |       |                                     |        |      |                                     |
|----------|--------|-------|-------------------------------------|--------|-------|--------------------------------------------------|--------|-------|-------------------------------------|--------|------|-------------------------------------|
| PG(34:2) | 0.00   | 0.00  | N.D.                                | 5.04   | 0.37  | 16:1_18:1<br>18:2_16:0                           | 0.00   | 0.00  | N.D.                                | 2.00   | 0.25 | 16:1_18:1<br>18:2_16:0              |
| PG(35:0) | 668.87 | 63.04 | 20:0_15:0                           | 581.48 | 47.20 | 20:0_15:0                                        | 772.35 | 19.76 | 20:0_15:0<br>18:0_17:0              | 491.91 | 6.40 | 20:0_15:0<br>18:0_17:0              |
| PG(35:1) | 17.07  | 1.75  | 20:1_15:0<br>19:1_16:0              | 61.86  | 5.26  | 20:1_15:0<br>18:1_17:0<br>19:1_16:0              | 19.16  | 0.22  | 20:1_15:0<br>19:1_16:0              | 14.66  | 0.46 | 20:1_15:0<br>19:1_16:0<br>18:1_17:0 |
| PG(35:2) | 0.00   | 0.00  | N.D.                                | 8.04   | 0.50  | 20:2_15:0<br>18:2_17:0<br>16:1_19:1              | 0.03   | 0.01  | N.D.                                | 6.04   | 0.23 | 20:2_15:0<br>18:2_17:0              |
| PG(35:4) | 0.00   | 0.00  | N.D.                                | 1.46   | 0.26  | 20:4_15:0<br>17:2_18:2<br>20:3_15:1              | 0.00   | 0.00  | N.D.                                | 20.13  | 0.60 | 20:4_15:0                           |
| PG(35:5) | 0.00   | 0.00  | N.D.                                | 0.00   | 0.00  | N.D.                                             | 0.00   | 0.00  | N.D.                                | 1.27   | 0.15 | 20:5_15:0<br>20:4_15:1              |
| PG(36:0) | 94.41  | 7.22  | 21:0_15:0<br>19:0_17:0<br>20:0_16:0 | 74.42  | 7.10  | 21:0_15:0<br>19:0_17:0<br>20:0_16:0<br>18:0_18:0 | 115.92 | 7.02  | 21:0_15:0<br>19:0_17:0<br>20:0_16:0 | 67.28  | 3.08 | 21:0_15:0<br>19:0_17:0<br>18:0_18:0 |
| PG(36:2) | 0.00   | 0.00  | N.D.                                | 46.15  | 4.14  | 18:1_18:1<br>18:2_18:0                           | 0.00   | 0.00  | N.D.                                | 0.39   | 0.16 | 18:2_18:0<br>18:1_18:1              |
| PG(36:3) | 0.11   | 0.05  | N.D.                                | 17.05  | 1.56  | 18:1_18:2<br>20:3_16:0                           | 0.00   | 0.00  | N.D.                                | 0.20   | 0.10 | 18:2_18:1                           |
| PG(36:4) | 0.00   | 0.00  | N.D.                                | 2.34   | 0.35  | 18:2_18:2<br>16:0_20:4<br>18:3_18:1              | 0.00   | 0.00  | N.D.                                | 0.25   | 0.06 | 18:2_18:2<br>20:3_16:1<br>20:4_16:0 |
| PG(37:0) | 11.36  | 1.17  | 22:0_15:0<br>20:0_17:0<br>18:0_15:0 | 10.57  | 0.56  | 20:0_17:0<br>18:0_19:0                           | 12.36  | 0.64  | 22:0_15:0<br>20:0_17:0<br>18:0_15:0 | 7.73   | 0.24 | 22:0_15:0<br>20:0_17:0<br>18:0_15:0 |
| PG(37:2) | 0.00   | 0.00  | N.D.                                | 1.85   | 0.11  | 19:0_18:2                                        | 0.00   | 0.00  | N.D.                                | 0.38   | 0.15 | 19:0_18:2                           |
| PG(37:4) | 0.00   | 0.00  | N.D.                                | 0.00   | 0.00  | N.D.                                             | 0.00   | 0.00  | N.D.                                | 0.91   | 0.05 | 20:4_17:0                           |

4

5 Not determined (N.D.)

6 \* Detected as [M-H]<sup>-</sup> ions

7 #Fatty acids are listed in order of isomer abundance.

8

9 **TABLE S2** The fatty acid profile of *S. aureus* grown in tryptic soy broth supplemented  
 10 with human LDLs.

| Phosphatidyl glycerol* (TC:TDB) | Cells cultured in TSB                  |                    |                                                  | Cells cultured in TSB with human LDL   |                    |                                                  |
|---------------------------------|----------------------------------------|--------------------|--------------------------------------------------|----------------------------------------|--------------------|--------------------------------------------------|
|                                 | Normalized ion abundance / mg of cells | Standard deviation | Fatty acids#                                     | Normalized ion abundance / mg of cells | Standard deviation | Fatty acids#                                     |
| PG(28:0)                        | 12.56                                  | 1.51               | 14:0_14:0                                        | 4.76                                   | 0.21               | 14:0_14:0                                        |
| PG(30:0)                        | 122.24                                 | 7.28               | 15:0_15:0<br>14:0_16:0                           | 36.57                                  | 1.26               | 15:0_15:0<br>14:0_16:0                           |
| PG(31:1)                        | 3.34                                   | 0.27               | 16:1_15:0                                        | 0.00                                   | 0.00               | N.D.                                             |
| PG(31:0)                        | 460.63                                 | 13.99              | 16:0_15:0<br>13:0_18:0<br>17:0_14:0              | 118.50                                 | 5.24               | 16:0_15:0<br>13:0_18:0<br>17:0_14:0              |
| PG(32:1)                        | 0.00                                   | 0.00               | N.D.                                             | 4.38                                   | 0.24               | 18:1_14:0<br>16:1_16:0                           |
| PG(32:0)                        | 326.07                                 | 1.63               | 17:0_15:0<br>14:0_18:0<br>16:0_16:0<br>19:0_13:0 | 74.26                                  | 2.97               | 17:0_15:0<br>14:0_18:0<br>16:0_16:0              |
| PG(33:1)                        | 15.30                                  | 0.38               | 18:1_15:0<br>19:1_14:0                           | 21.05                                  | 0.71               | 18:1_15:0                                        |
| PG(33:0)                        | 1103.22                                | 6.40               | 18:0_15:0<br>19:0_14:0<br>17:0_16:0<br>20:0_13:0 | 248.69                                 | 13.24              | 18:0_15:0<br>19:0_14:0<br>17:0_16:0<br>20:0_13:0 |
| PG(34:2)                        | 0.00                                   | 0.00               | N.D.                                             | 1.50                                   | 0.05               | 18:2_16:0                                        |
| PG(34:1)                        | 4.17                                   | 0.08               | 19:1_15:0<br>20:1_14:0                           | 6.37                                   | 0.29               | 18:1_16:0                                        |
| PG(34:0)                        | 279.90                                 | 2.14               | 19:0_15:0<br>20:0_14:0<br>18:0_16:0<br>17:0_17:0 | 47.91                                  | 1.95               | 20:0_14:0<br>19:0_15:0                           |
| PG(35:1)                        | 22.04                                  | 0.62               | 20:1_15:0<br>21:1_14:0<br>19:1_16:0              | 8.74                                   | 0.49               | 20:1_15:0                                        |
| PG(35:0)                        | 877.73                                 | 9.10               | 20:0_15:0<br>18:0_17:0<br>21:0_14:0              | 150.25                                 | 6.87               | 20:0_15:0                                        |
| PG(36:3)                        | 0.00                                   | 0.00               | N.D.                                             | 4.56                                   | 0.27               | 18:1_18:2                                        |
| PG(36:2)                        | 0.00                                   | 0.00               | N.D.                                             | 13.15                                  | 0.59               | 18:1_18:1<br>18:0_18:2                           |
| PG(36:0)                        | 19.83                                  | 0.38               | 21:0_15:0<br>20:0_16:0<br>19:0_17:0              | 2.25                                   | 0.03               | 20:0_16:0<br>21:0_15:0                           |
| PG(37:0)                        | 12.73                                  | 0.22               | 22:0_15:0<br>20:0_17:0<br>23:0_14:0              | 2.15                                   | 0.08               | 22:0_15:0                                        |

11 Not determined (N.D.)

12 \* Detected as [M-H]<sup>-</sup> ions

13 #Fatty acids are listed in order of isomer abundance.

14 **Table S3** Characterization of FASII initiation genes of the fatty acid auxotrophs.

| Isolate | <i>fabD</i> variation<br>(SAUSA300_1123)          | <i>accA</i> variation<br>(SAUSA300_1646) | <i>accB</i> variation<br>(SAUSA300_1476) | <i>accC</i> variation<br>(SAUSA300_1475) | <i>accD</i> variation<br>(SAUSA300_1647) |
|---------|---------------------------------------------------|------------------------------------------|------------------------------------------|------------------------------------------|------------------------------------------|
| 1A      | WT                                                | WT                                       | NtΔ 1,644,142 –<br>1,644,251             | WT                                       | WT                                       |
| 1B      | WT                                                | WT                                       | WT                                       | WT                                       | WT                                       |
| 1C      | WT                                                | WT                                       | WT                                       | NtΔ 1,643,889 –<br>1,643,971             | WT                                       |
| 2A      | WT                                                | NtΔ 1,808,761 -<br>1,808,943             | WT                                       | WT                                       | WT                                       |
| 2B      | WT                                                | WT                                       | WT                                       | WT                                       | WT                                       |
| 2C      | WT                                                | WT                                       | WT                                       | WT                                       | Nt 1,809,715 C→A                         |
| 3A      | WT                                                | WT                                       | WT                                       | WT                                       | WT                                       |
| 3B      | WT                                                | WT                                       | WT                                       | WT                                       | WT                                       |
| 3C      | NtΔ 1,243,511 –<br>1,243,626; Nt<br>1,243,630 C→A | WT                                       | WT                                       | NtΔ 1,642,929 T                          | WT                                       |

15

16 Nt - Nucleotide (Nt)

17 NtΔ nucleotide(s) deletion

18

19

20

21 **Table S4** Phosphatidyl glycerol species from cells cultured with human LDLs that contain  
22 exogenous, unsaturated fatty acids in both the sn1 and sn2 position.

23  
24  
25  
26  
27  
28  
29  
30  
31  
32  
33  
34  
35  
36  
37  
38  
39  
40  
41  
42  
43  
44

| Phosphatidyl glycerol | Fatty acids            |
|-----------------------|------------------------|
| PG(34:2)              | 16:1_18:1              |
| PG(35:2)              | 16:1_19:1              |
| PG(35:4)              | 17:2_18:2<br>20:3_15:1 |
| PG(36:2)              | 18:1_18:1              |
| PG(36:3)              | 18:2_18:1              |
| PG(36:4)              | 18:2_18:2<br>18:3_18:1 |

45 **Table S5** Hypothetical lipases of *S. aureus* strain USA300

| Locus tag     | Description                    |
|---------------|--------------------------------|
| SAUSA300_0070 | putative lysophospholipase     |
| SAUSA300_0641 | putative lipase/esterase       |
| SAUSA300_1710 | putative lysophospholipase     |
| SAUSA300_2457 | phospholipase/carboxylesterase |

49

50

51

52

53

54

55

56

57

58

59

60

61

62

63

64

65

66

67

68

69

70

71

72

73

74

75

76

77

78

79

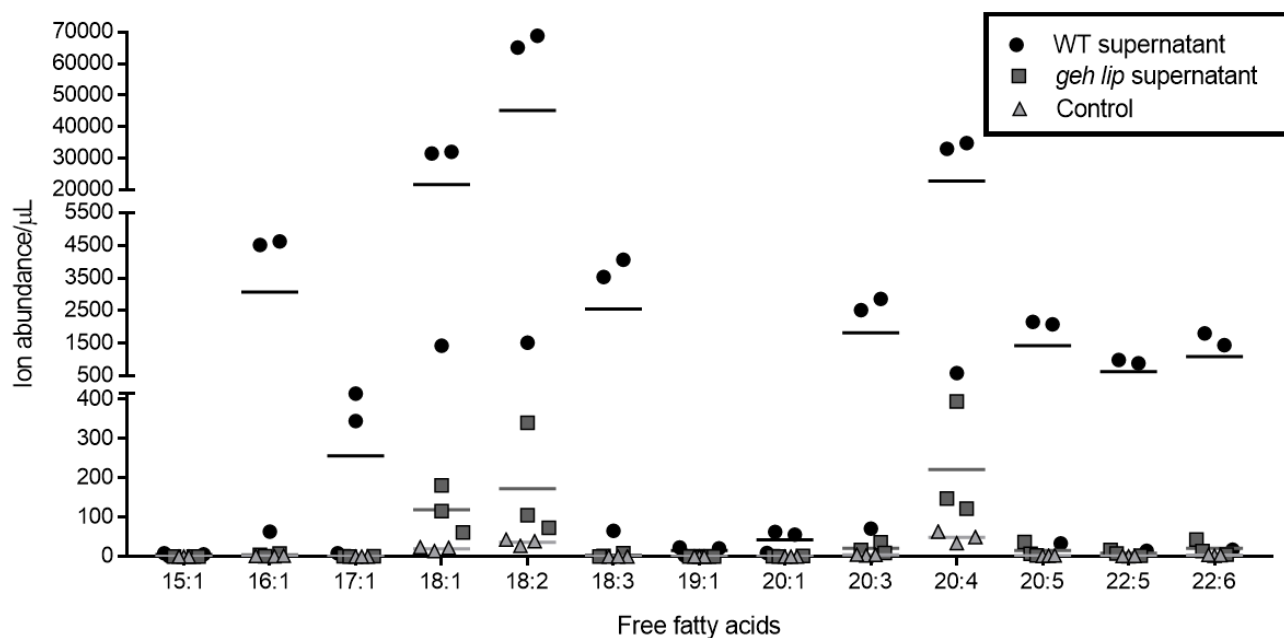

80

81 **FIG S1 Incubation of human LDLs with *S. aureus* supernatants results in the**  
 82 **liberation of free fatty acids that is dependent on secreted lipases. WT and the *geh***  
 83 ***lip* double mutant were grown overnight in tryptone broth. Cultures were pelleted and the**  
 84 **supernatants collected and chemically sterilized. The supernatants or a broth only control**  
 85 **(control) were incubated with 5% human LDLs at 37°C for two hours in triplicate. Free**  
 86 **fatty acids were detected by direct infusion high resolution/accurate mass spectrometry**  
 87 **and tandem mass spectrometry.**

88

89

90

91

92

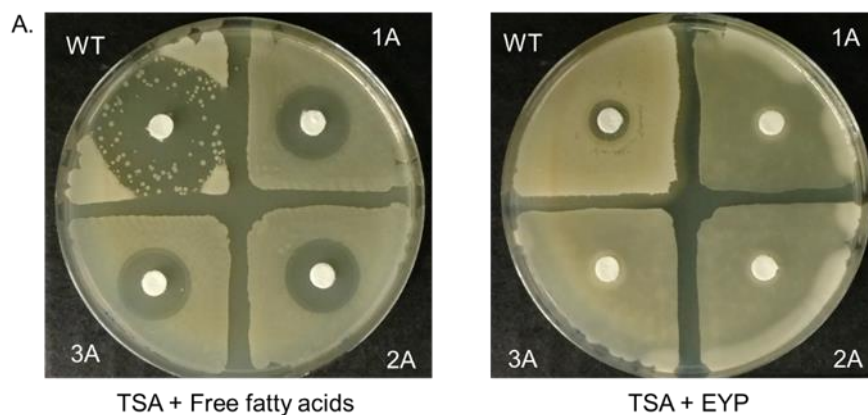

93

94 **FIG S2 The growth of triclosan-resistant, fatty acid auxotrophs is supported by**  
95 **lipoprotein particles.** (A) Triclosan-resistant fatty acid auxotrophs were plated as a lawn  
96 on TSA with the following supplement: free fatty acid mixture or 1% EYP. A 6mm filter  
97 disk containing with 10 $\mu$ L of 1.7mM triclosan was placed on top of the agar. Plates were  
98 incubated for ~36 hours at 37°C.

99

100

101

102

103

104

105

106

107

108

109



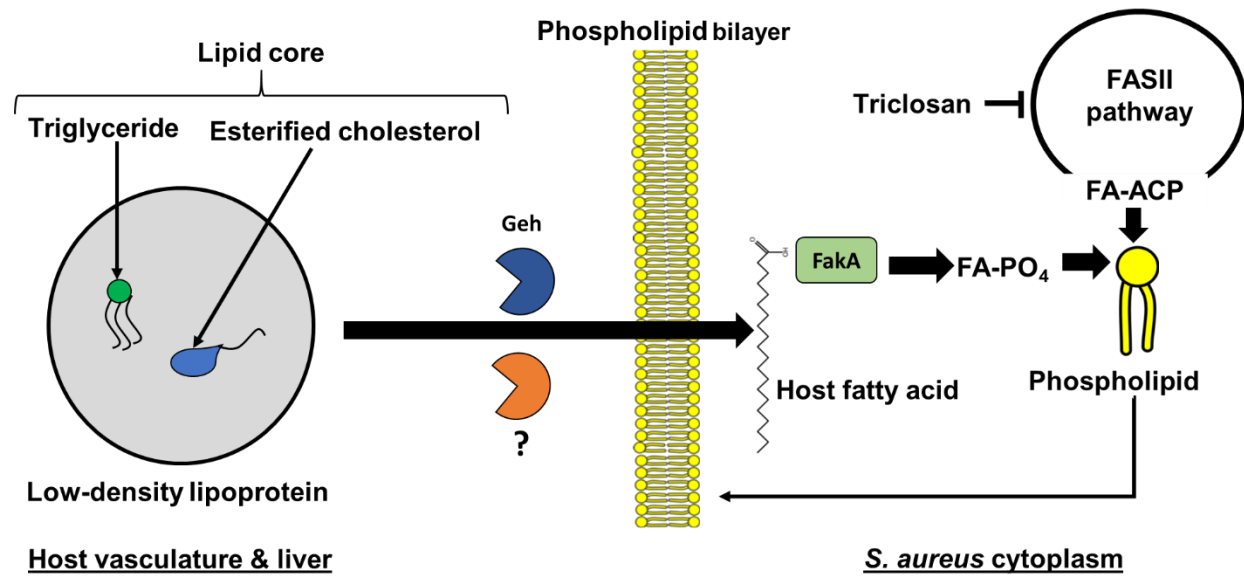

110

111 **FIG S3 A model for the incorporation of fatty acids present in host LDLs into the *S.***  
 112 ***aureus* membrane.** Lipases secreted by *S. aureus* liberate fatty acids from the  
 113 triglycerides, esterified cholesterol, and phospholipids of human LDL. The fatty acids are  
 114 then incorporated into the staphylococcal membrane via the activity of FakA. This process  
 115 allows *S. aureus* to bypass FASII inhibition by triclosan.

116

117
